# Supplementary material for: pH-Dependent formation of three porous In(iii)-MOFs: framework diversity and selective gas adsorption
Source: Royal Society of Chemistry journal article supplement (doi:10.1039/d1dt02935e), 2021-12-07
Supplement: d1dt02935e1.pdf [file d1dt02935e1.pdf]

## Supporting Information

### **pH-dependent formation of three porous In(III)-MOFs: framework diversity and selective gas adsorption**

Chengcheng Zhang,<sup>a,‡</sup> Yuanyuan Qin,<sup>a,‡</sup> Lijuan Duan,<sup>a</sup> Lu Wang,<sup>a</sup> Yuewei Wu,<sup>a</sup> Yan Guo,<sup>a\*</sup> Weiming Song<sup>a</sup> and Xiangyu Liu<sup>a,b\*</sup>

<sup>a</sup> State Key Laboratory of High-efficiency Utilization of Coal and Green Chemical Engineering, National Demonstration Center for Experimental Chemistry Education, College of Chemistry and Chemical Engineering, Ningxia University, Yinchuan 750021, China.

<sup>b</sup> State Key Laboratory of Coordination Chemistry, Nanjing University, Nanjing, 210023, China.

<sup>‡</sup> These authors contributed equally to this work.

**\*Corresponding author**

**Dr. Xiangyu Liu**

**E-mail: [xiangyuliu432@126.com](mailto:xiangyuliu432@126.com)**

**\*Corresponding author**

**Dr. Yan Guo**

**E-mail: [452785231@qq.com](mailto:452785231@qq.com)**

## Contents:

### 1. Experimental Section

### 2. Quantum chemical calculations

**Table S1.** Selected crystallographic data for complexes **NXU-1**, **NXU-2**, **NXU-3**.

**Table S2.** Selected Bond Lengths (Å) and Bond Angles (°) for **NXU-1**.

**Table S3.** Selected Bond Lengths (Å) and Bond Angles (°) for **NXU-2**.

**Table S4.** Selected Bond Lengths (Å) and Bond Angles (°) for **NXU-3**.

**Figure S1.** (a) 2D view of a structural fragment of **NXU-1**; (b) 3D structure of **NXU-1** along the c axis; (c) View of the (3,10)-connected topological network for **NXU-1**.

**Figure S2.** (a) 3D structure of **NXU-2** viewed along the a axis; (b) 3D structure of **NXU-2** with 1D channels along the c axis; (c) View of the (3,5)-connected topological network for **NXU-2**.

**Figure S3.** (a) 2D view of a structural fragment of **NXU-3** along the c-axis; (b) 3D structure of **NXU-3** with 1D channels along the c-axis; (c) View of the (3,5)-connected topological network for **NXU-3**.

**Figure S4.** PXRD pattern of **NXU-1** simulated from the X-ray single-crystal structure, as-synthesized, activated and after adsorption sample.

**Figure S5.** PXRD pattern of **NXU-2** simulated from the X-ray single-crystal structure, as-synthesized, activated and after adsorption sample.

**Figure S6.** PXRD pattern of **NXU-3** simulated from the X-ray single-crystal structure, as-synthesized, activated and after adsorption sample.

**Figure S7.** TGA plots of **NXU-1** (a), **NXU-2** (b) and **NXU-3** (c) under a N<sub>2</sub> environment.

**Figure S8.** PXRD profiles of **NXU-1** after being soaked in acidic and basic solutions (a), different solvents (b) and water (c).

**Figure S9.** CO<sub>2</sub> sorption isotherms of **NXU-2** (a) and **NXU-3** (b) at 273 and 298 K.

**Figure S10.** CO<sub>2</sub> adsorption isotherms of **NXU-1** with fitting by L-F model.

**Figure S11.** CO<sub>2</sub> adsorption isotherms for **NXU-1** with fitting by Virial 2 model.

**Figure S12.** Adsorption enthalpies of CH<sub>4</sub> for **NXU-1**.

**Figure S13.** Optimized binding sites for CO<sub>2</sub> in **NXU-1**, C, gray; In, brown; O, red; N, blue.

### 3. References

## 1. Experimental section

### Materials and Methods.

All reagents used for the synthesis were purchased from commercial sources and used without further purification. Elemental analyses of C, H and N were performed on a Vario EL III analyzer. Infrared (IR) spectra were recorded on a Bruker FTTR instrument with KBr pellets (4000-400 $\text{cm}^{-1}$ ). The thermogravimetric analysis (TGA) on **NXU-1** (6.86 mg), **NXU-2** (5.48 mg) and **NXU-3** (4.80 mg) were performed using a CDR-4P thermal analysis system under a  $\text{N}_2$  atmosphere from room temperature to 900 °C at a ramping rate of 10 °C/min. Powder X-ray diffraction measurements were carried out on a Rigaku RU200 diffractometer at 60 kV, 300 mA, and Cu  $K\alpha$  radiation ( $\lambda = 1.5406 \text{ \AA}$ ). The gas adsorption properties were studied on an ASAP 2460 surface area analyzer.

**Synthesis of  $\text{H}_3\text{O}[\text{In}_3(\text{pta})_4(\text{OH})_2]\cdot 10\text{H}_2\text{O}$  (NXU-1) (CCDC:2101490).** A mixture of  $\text{In}(\text{NO}_3)_3\cdot 6\text{H}_2\text{O}$  (0.25 mmol, 0.0073 g) and  $\text{H}_2\text{pta}$  (0.05 mmol, 0.0122 g) in the mixed  $\text{H}_2\text{O}$  (4mL) and  $\text{C}_2\text{H}_5\text{OH}$  (2mL) solvents with pH value adjusted to 8.0 with 60  $\mu\text{L}$  trimethylamine was placed in a Teflon-lined stainless steel vessel (15 mL), heated to 160 °C for 96 h and then cooled to room temperature at a rate of 5 °C  $\text{h}^{-1}$ . The brown rodlike crystals were obtained and dried in air to give 0.0052 g, yield 62.3% based on In. Anal. Calcd for  $\text{C}_{52}\text{H}_{53}\text{In}_3\text{N}_4\text{O}_{29}$  (1542.46): C, 40.49; H, 3.46; N, 3.63%. Found: C, 40.67; H, 3.55; N, 3.78%. Main IR features (KBr pellet,  $\text{cm}^{-1}$ ): 3399(vs), 3065(s), 1708(vs), 1618(s), 1491(w), 1364(w), 1292(s), 1220(s), 832(m), 750(m), 551(m).

**Synthesis of  $[\text{In}(\text{pta})_2]\cdot \text{C}_3\text{H}_{10}\text{N}$  (NXU-2) (CCDC:2101491).** Brown square crystals of **NXU-2** can be obtained following the same synthetic procedure as that for **NXU-1** except that the pH value was adjusted to 5.0 with 30  $\mu\text{L}$  trimethylamine. Anal. Calcd for  $\text{C}_{29}\text{H}_{24}\text{InN}_3\text{O}_8$  (657.33): C, 52.98; H, 3.68; N, 6.39%. Found: C, 52.19; H, 3.52; N, 6.28%. Main IR features (KBr pellet,  $\text{cm}^{-1}$ ): 3402 (m), 3061 (w), 2924 (m), 1958 (w), 1666 (s), 1583 (s), 1489 (m), 1415 (s), 1351 (s), 1268 (m), 1223 (w), 1095

(w), 863 (w), 769 (m), 582 (w).

**Synthesis of [In(pta)<sub>2</sub>] $\cdot$ C<sub>3</sub>H<sub>10</sub>N (NXU-3) (CCDC:2101492).** The synthetic procedure for **NXU-3** was basically the same as that of **NXU-1** except that the pH of the mixture was measured to 3.0. Anal. Calcd for C<sub>29</sub>H<sub>24</sub>InN<sub>3</sub>O<sub>8</sub> (657.33): C, 52.98%; H, 3.68%; N, 6.39%. Found: C, 52.17%; H, 3.47%; N, 6.22%. Main IR features (KBr pellet, cm<sup>-1</sup>): 3214(m), 3066(w), 2362(w), 1953(w), 1849(w), 1612(s), 1489(m), 1410(s), 1350(s), 1267(m), 1218(m), 1115(w), 1066(w), 863(m), 769(m), 553(w).

### **X-ray crystallography**

Single-crystal X-ray diffraction data were collected on a Bruker SMART APEX-CCD-based diffractometer using graphite monochromated either Cu ( $\lambda = 1.54184 \text{ \AA}$ ) or Ga ( $\lambda = 1.34139 \text{ \AA}$ ) radiation. Data processing and absorption corrections were accomplished using SAINT and SADABS.<sup>1</sup> The structures were solved by direct methods and refined against  $F^2$  by fullmatrix least-squares with SHELXTL-2014.<sup>2</sup> All the hydrogen atoms were located at geometrically calculated positions. The diffraction contribution of the highly disordered solvent molecules located in the structure was eliminated by applying the program SQUEEZE implemented in PLATON. The final formula of **NXU-1** - **NXU-3** were ascertained by combining the crystallographic data, elemental microanalyses, and TGA data. The detailed structural refinement results are given in Table S1, and the selected bond lengths and angles are provided in Tables S2-S4.

## **2. Quantum chemical calculations**

For complex **NXU-1**, we have employed the first-principles to perform all density functional theory (DFT) calculations within the generalized gradient approximation (GGA) using the Perdew-Burke-Ernzerhof (PBE) formulation.<sup>3</sup> We have chosen the projected augmented wave (PAW) potentials to describe the ionic cores and take valence electrons into account using a plane wave basis set with a kinetic energy cutoff of 630 eV. Partial occupancies of the Kohn-Sham orbitals were allowed using the Gaussian smearing method and a width of 0.05 eV. The electronic energy was considered self-consistent when the energy change was smaller than  $10^{-4}$  eV. A

geometry optimization was considered convergent when the energy change was smaller than  $10^{-6}$  eV.

**Table S1.** Selected crystallographic data for complexes **NXU-1**, **NXU-2**, **NXU-3**.

| Complex                                  | NXU-1                                                                          | NXU-2                                                           | NXU-3                                                           |
|------------------------------------------|--------------------------------------------------------------------------------|-----------------------------------------------------------------|-----------------------------------------------------------------|
| Empirical formula                        | C <sub>52</sub> H <sub>30</sub> In <sub>3</sub> N <sub>4</sub> O <sub>18</sub> | C <sub>26</sub> H <sub>14</sub> InN <sub>2</sub> O <sub>8</sub> | C <sub>26</sub> H <sub>14</sub> InN <sub>2</sub> O <sub>8</sub> |
| Formula weight                           | 1343.26                                                                        | 643.31                                                          | 643.30                                                          |
| Temperature                              | 156 K                                                                          | 193 K                                                           | 193 K                                                           |
| Crystal system                           | monoclinic                                                                     | monoclinic                                                      | tetragonal                                                      |
| Space group                              | <i>P21/n</i>                                                                   | <i>C2/c</i>                                                     | <i>P42/mbc</i>                                                  |
| <i>a</i> (Å)                             | 15.2038(2)                                                                     | 26.8733(11)                                                     | 20.2125(7)                                                      |
| <i>b</i> (Å)                             | 22.6496(3)                                                                     | 20.7854(8)                                                      | 20.2125(7)                                                      |
| <i>c</i> (Å)                             | 22.0920(3)                                                                     | 22.4567(9)                                                      | 22.9119(9)                                                      |
| $\alpha$ (°)                             | 90                                                                             | 90                                                              | 90                                                              |
| $\beta$ (°)                              | 108.9446(16)                                                                   | 124.201(2)                                                      | 90                                                              |
| $\gamma$ (°)                             | 90                                                                             | 90                                                              | 90                                                              |
| <i>V</i> (Å <sup>3</sup> )               | 7194.95(19)                                                                    | 10374.5(7)                                                      | 9360.6(7)                                                       |
| <i>Z</i>                                 | 4                                                                              | 8                                                               | 8                                                               |
| <i>D</i> (g/cm <sup>3</sup> )            | 1.240                                                                          | 0.824                                                           | 0.913                                                           |
| <i>Mu</i> (mm <sup>-1</sup> )            | 8.109                                                                          | 2.641                                                           | 2.927                                                           |
| <i>F</i> (0 0 0)                         | 2644.0                                                                         | 2592                                                            | 2592                                                            |
| Unique reflections                       | 12626                                                                          | 17852                                                           | 4939                                                            |
| Observed reflections                     | 24333                                                                          | 17852                                                           | 173822                                                          |
| <i>R</i> <sub>int</sub>                  | 0.0321                                                                         | 0.0645                                                          | 0.0664                                                          |
| Final <i>R</i> indices                   | <i>R</i> <sub>1</sub> =0.0699                                                  | <i>R</i> <sub>1</sub> =0.0746                                   | <i>R</i> <sub>1</sub> =0.0648                                   |
| [ <i>I</i> >2σ( <i>I</i> )]              | <i>wR</i> <sub>2</sub> =0.1928                                                 | <i>wR</i> <sub>2</sub> =0.2224                                  | <i>wR</i> <sub>2</sub> =0.2029                                  |
| <i>R</i> indices (all data)              | <i>R</i> <sub>1</sub> =0.0825                                                  | <i>R</i> <sub>1</sub> =0.1036                                   | <i>R</i> <sub>1</sub> =0.0685                                   |
|                                          | <i>wR</i> <sub>2</sub> =0.2051                                                 | <i>wR</i> <sub>2</sub> =0.2449                                  | <i>wR</i> <sub>2</sub> =0.2074                                  |
| Goodness-of-fit on <i>F</i> <sup>2</sup> | 1.053                                                                          | 1.075                                                           | 1.052                                                           |

**Table S2.** Selected Bond Lengths (Å) and Bond Angles (°) for **NXU-1**

| NXU-1        |           |              |           |                     |          |
|--------------|-----------|--------------|-----------|---------------------|----------|
| In(1)-O(1)   | 2.107(11) | In(2)-O(9)   | 2.069(6)  | O(1)-In(1)-O(4)#1   | 173.4(4) |
| In(1)-O(4)#1 | 2.172(4)  | In(2)-O(3)#4 | 2.161(5)  | O(1)-In(1)-O(5)     | 89.3(6)  |
| In(1)-O(5)   | 2.110(3)  | In(2)-O(8)#5 | 2.162(6)  | O(5)-In(1)-N(1)#3   | 90.5(6)  |
| In(1)-O(7)#2 | 2.185(5)  | In(2)-O(9)#6 | 2.069(6)  | O(9)-In(1)-O(1)     | 89.9(3)  |
| In(1)-O(9)   | 2.083(5)  | O(1)-C(1)    | 1.154(12) | O(3)#4-In(2)-O(8)#2 | 91.1(2)  |
| In(1)-N(1)#3 | 2.232(5)  | O(2)-C(1)    | 1.322(13) | O(9)-In(2)-O(3)#1   | 92.4(2)  |

|                            |          |                          |           |                        |         |
|----------------------------|----------|--------------------------|-----------|------------------------|---------|
| In(2)-O(3)#1               | 2.161(5) | N(1)-C(10)               | 1.355(17) | O(9)-In(2)-O(8)#2      | 90.6(2) |
| In(2)-O(8)#2               | 2.162(6) | N(1)-C(11)               | 1.328(15) | O(9)#6-In(2)-O(8)#5    | 90.6(2) |
| #1 $-1/2+x, 3/2-y, -1/2+z$ |          | #2 $1/2-x, 1/2+y, 1/2-z$ |           | #3 $1/2-x, 3/2-y, 1-z$ |         |
| $+x, 1-y, -1/2+z$          |          | #6 $1/2-x, 3/2-y, -z$    |           | #4 $1-x, +y, 1/2+z$    | #5      |

**Table S3.** Selected Bond Lengths (Å) and Bond Angles (°) for NXU-2

| NXU-2                |           |                     |            |                          |            |
|----------------------|-----------|---------------------|------------|--------------------------|------------|
| In(1)-O(1)           | 2.121(5)  | O(1)-In(1)-O(4)#1   | 170.8(2)   | O(1)-In(1)-O(8)#3        | 85.41(18)  |
| In(1)-O(4)#1         | 2.143(5)  | O(1)-In(1)-O(6)     | 104.0(2)   | O(6)-In(1)-O(8)#3        | 141.5(2)   |
| In(1)-O(6)           | 2.202(5)  | O(4)#1-In(1)-O(6)   | 84.2(2)    | N(1)#2-In(1)-O(8)#3      | 81.09(18)  |
| In(1)-O(7)#3         | 2.295(5)  | O(1)-In(1)-N(1)#2   | 83.8(2)    | N(1)#2-In(1)-O(5)        | 81.28(18)  |
| In(1)-O(5)           | 2.336(5)  | O(6)-In(1)-N(1)#2   | 136.38(19) | N(1)#2-In(1)-O(7)#3      | 136.90(18) |
| In(1)-N(1)#2         | 2.2281(6) | O(1)-In(1)-O(5)     | 83.5(2)    | O(5)-In(1)-O(8)#3        | 160.22(19) |
| In(2)-O(8)#3         | 2.348(5)  | O(6)-In(1)-O(5)     | 57.7(2)    | O(7)#3-In(1)-O(5)        | 140.03(19) |
| O(1)-C(1)            | 1.272(10) | O(4)#1-In(1)-O(5)   | 104.67(19) | O(1)-In(1)-O(7)#3        | 89.3(2)    |
| #1 $+x, -1-y, 1/2+z$ |           | #2 $1-x, +y, 3/2-z$ |            | #3 $1/2-x, 1/2+y, 3/2-z$ |            |

**Table S4.** Selected Bond Lengths (Å) and Bond Angles (°) for NXU-3

| NXU-3                   |          |                     |  |                        |          |
|-------------------------|----------|---------------------|--|------------------------|----------|
| In(1)-O(1)#3            | 2.197(5) | O(1)#3-In(1)-O(4)   |  | O(1)#2-In(1)-O(5)      |          |
| In(1)-O(4)              | 2.246(6) | O(5)-In(1)-O(4)     |  | O(1)#2-In(1)-O(2)#3    |          |
| In(1)-O(5)              | 2.241(6) | O(5)-In(1)-N(1)#4   |  | C(11)-N(1)-C12         | 118.5(7) |
| In(1)-N(1)#4            | 2.256(6) | O(4)-In(1)-N(1)#4   |  | C(11)-N(1)-In(1)#4     | 122.0(5) |
| In(1)-O(2)#3            | 2.419(5) | O(5)-In(1)-O(2)#3   |  | C(12)-N(1)-In(1)#4     | 119.5(5) |
| In(1)-O(1)#2            | 2.130(5) | O(1)#3-In(1)-O(2)#3 |  | C(1)-O(1)-In(1)#1      | 95.9(4)  |
| O(1)-C(1)               | 1.265(8) | O(4)-In(1)-O(2)#3   |  | C(8)-O(4)-In(1)        | 95.0(5)  |
| O(2)-C(1)               | 1.236(8) | C(8)-O(5)-In(1)     |  | N(1)#4-In(1)-O(2)#3    |          |
| #1 $1/2-x, -1/2+y, 1-z$ |          | #2 $+x, +y, 1-z$    |  | #3 $1/2-x, 1/2+y, 1-z$ |          |
|                         |          |                     |  | #4 $-x, 1-y, 1-z$      |          |

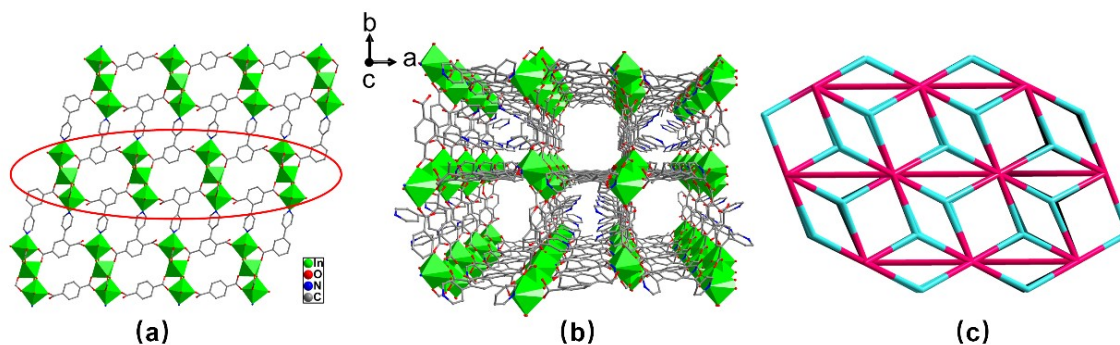

**Figure S1.** (a) 2D view of a structural fragment of NXU-1; (b) 3D structure of NXU-

1 along the c axis; (c) View of the (3,10)-connected topological network for NXU-1.

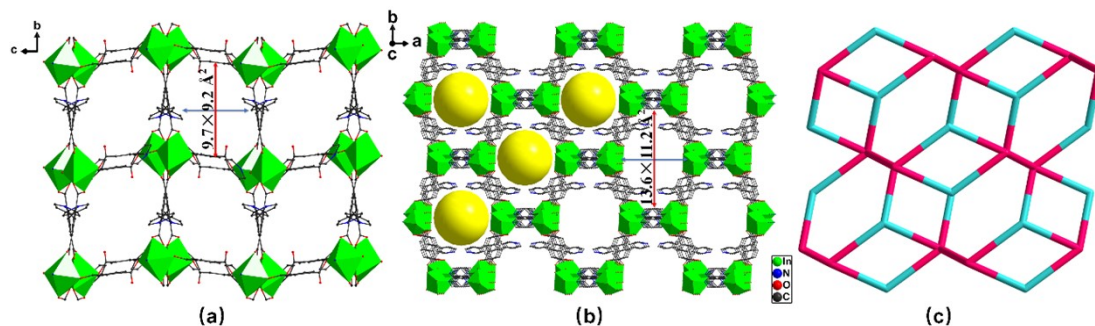

**Figure S2.** (a) 3D structure of NXU-2 viewed along the a axis; (b) 3D structure of NXU-2 with 1D channels along the c axis; (c) View of the (3,5)-connected topological network for NXU-2.

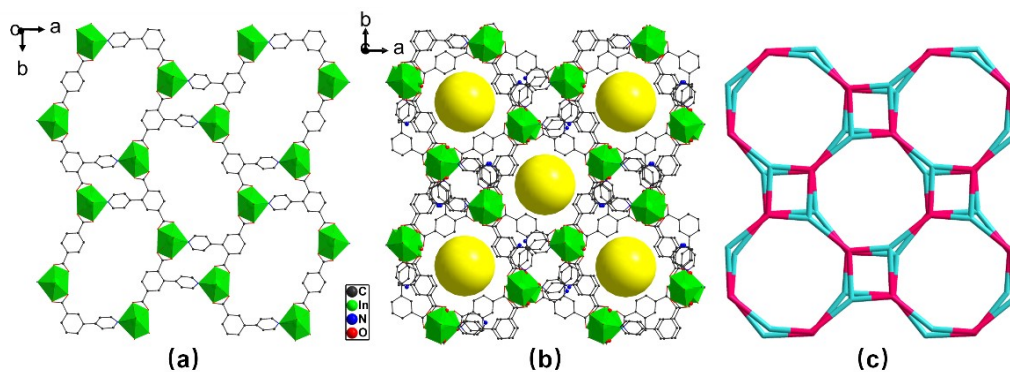

**Figure S3.** (a) 2D view of a structural fragment of NXU-3 along the c-axis; (b) 3D structure of NXU-3 with 1D channels along the c-axis; (c) View of the (3,5)-connected topological network for NXU-3.

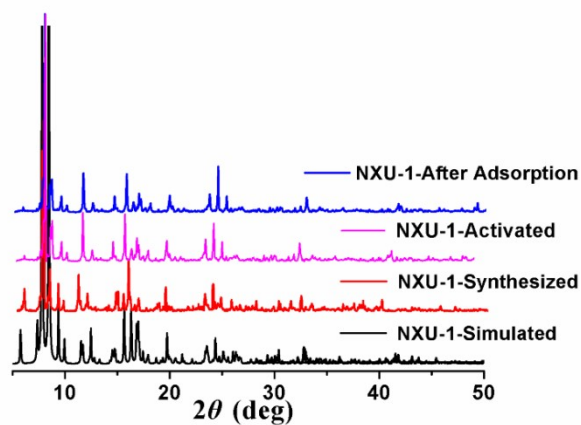

**Figure S4.** PXRD pattern of NXU-1 simulated from the X-ray single-crystal structure, as-synthesized, activated and after adsorption sample.

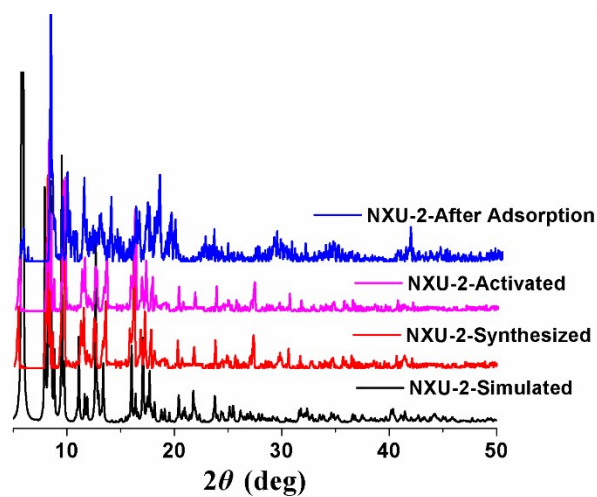

**Figure S5.** PXRD pattern of NXU-2 simulated from the X-ray single-crystal structure, as-synthesized, activated and after adsorption sample.

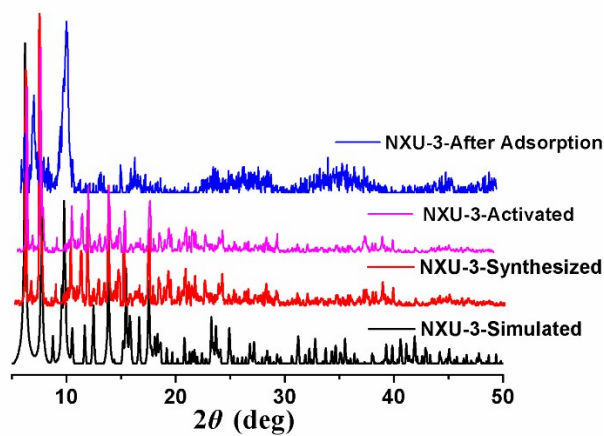

**Figure S6.** PXRD pattern of NXU-3 simulated from the X-ray single-crystal structure, as-synthesized, activated and after adsorption sample.



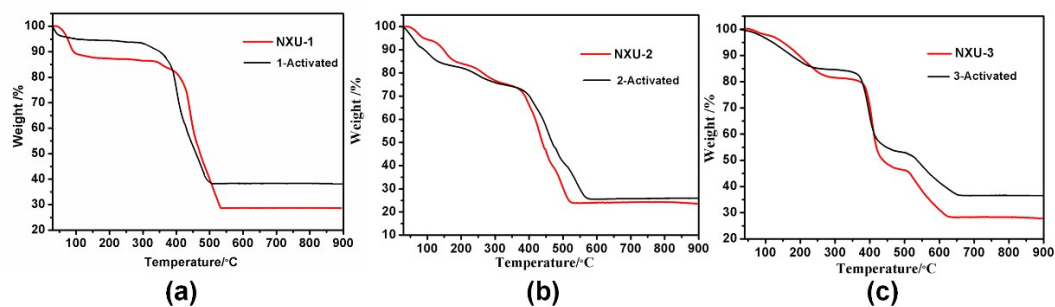

**Figure S7.** TGA plots of NXU-1 (a), NXU-2 (b) and NXU-3 (c) under a  $N_2$  environment.

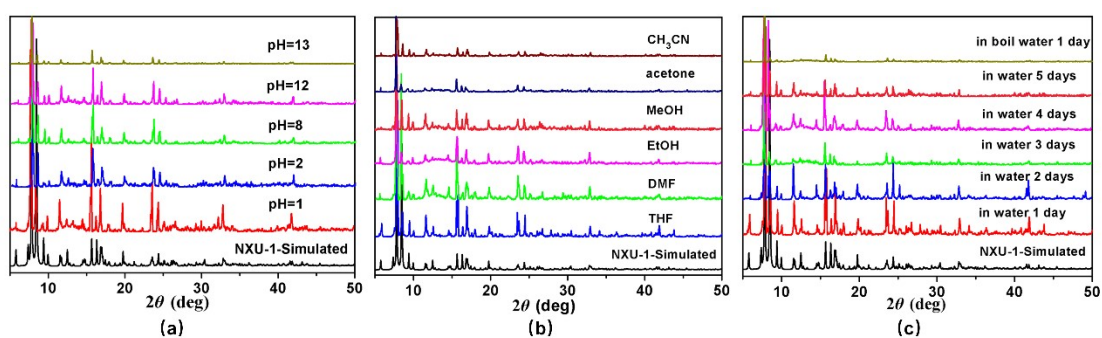

**Figure S8.** PXRD profiles of NXU-1 after being soaked in acidic and basic solutions (a), different solvents (b) and water (c).

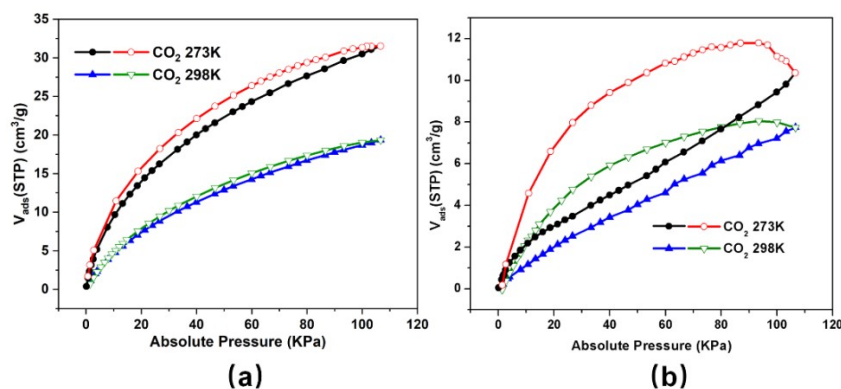

**Figure S9.**  $CO_2$  sorption isotherms of NXU-2 (a) and NXU-3 (b) at 273 and 298 K.

### IAST adsorption selectivity calculation:

The experimental isotherm data for pure  $CO_2$  and  $CH_4$  (measured at 298) were fitted using a dual Langmuir-Freundlich (L-F) model:

$$q = \frac{a_1 * b_1 * p^{1/c_1}}{1 + b_1 * p^{1/c_1}} + \frac{a_2 * b_2 * p^{1/c_2}}{1 + b_1 * p^{1/c_1}}$$

Where  $q$  and  $p$  are adsorbed amounts and pressures of component  $i$ , respectively.

The adsorption selectivity for binary mixtures of  $\text{CO}_2/\text{CH}_4$ , defined by

$$S_{ij} = \frac{x_i * y_j}{x_j * y_i}$$

were calculated using the Ideal Adsorption Solution Theory (IAST) of Myers and Prausnitz.

Where  $x_i$  is the mole fraction of component  $i$  in the adsorbed phase and  $y_i$  is the mole fraction of component  $i$  in the bulk.

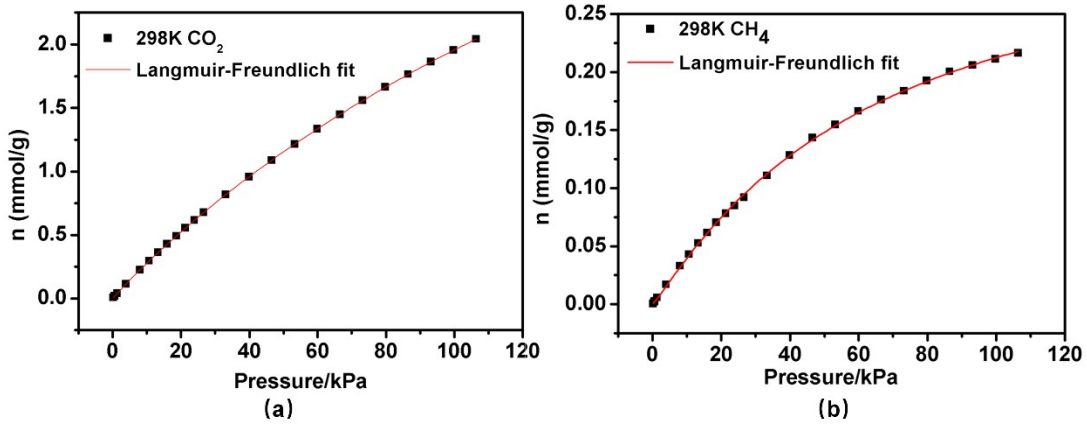

**Figure S10.**  $\text{CO}_2$  adsorption isotherms of NXU-1 with fitting by L-F model:  $a_1 = 7.0273$ ,  $b_1 = 0.0043$ ,  $c_1 = 0.9737$ ,  $R^2 = 1$ ;  $\text{CH}_4$  adsorption isotherms of NXU-1 with fitting by L-F model:  $a_1 = 0.343$ ,  $b_1 = 0.010$ ,  $c_1 = 1.093$ ,  $R^2 = 0.99974$ .

#### Calculation of sorption heat for $\text{CO}_2$ and $\text{CH}_4$ uptakes using Virial 2 model

$$\ln p = \ln N + 1/T \sum_{i=0}^m a_i N^i + \sum_{i=0}^n b_i N^i \quad Q_{st} = -R \sum_{i=0}^m a_i N^i$$

The above equation was applied to fit the combined  $\text{CO}_2$  and  $\text{CH}_4$  isotherm data for NXU-1 at 273 and 298 K, where  $P$  is the pressure,  $N$  is the adsorbed amount,  $T$  is the temperature,  $a_i$  and  $b_i$  are virial coefficients, and  $m$  and  $n$  are the number of coefficients used to describe the isotherms.  $Q_{st}$  is the coverage-dependent enthalpy of

adsorption and  $R$  is the universal gas constant.

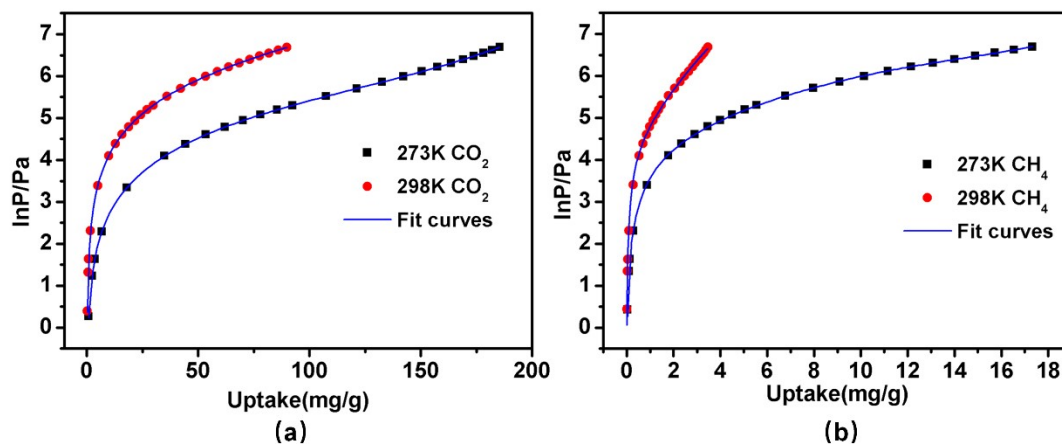

**Figure S11.** CO<sub>2</sub> adsorption isotherms for NXU-1 with fitting by Virial 2 model. Fitting results:  $a_0 = -4620.16743$ ,  $a_1 = 4.03007$ ,  $a_2 = -0.04718$ ,  $a_3 = 6.56431 \times 10^{-6}$ ,  $a_4 = -1.17051 \times 10^{-7}$ ,  $b_0 = 17.25724$ ,  $b_1 = -0.00788$ ,  $b_2 = 1.38908 \times 10^{-4}$ ,  $b_3 = 5.61989 \times 10^{-8}$ ,  $R^2 = 0.99997$ ; CH<sub>4</sub> adsorption isotherms for NXU-1 with fitting by Virial 2 model. Fitting results:  $a_0 = -4051.51954$ ,  $a_1 = 560.9957$ ,  $a_2 = -561.78977$ ,  $a_3 = 66.67458$ ,  $a_4 = 0.00838$ ,  $b_0 = 16.46272$ ,  $b_1 = -2.12285$ ,  $b_2 = 2.07434$ ,  $b_3 = -0.24544$ ,  $R^2 = 0.998$ .

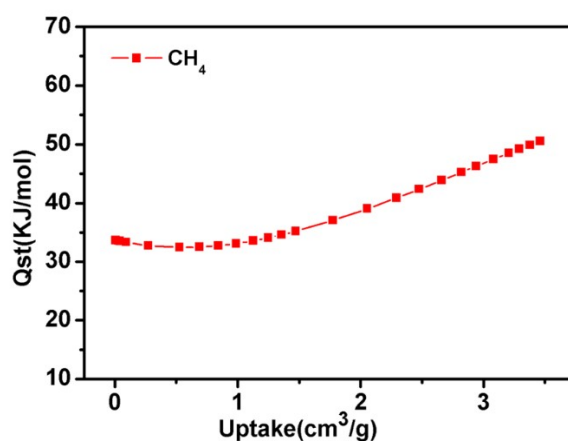

**Figure S12.** Adsorption enthalpies of CH<sub>4</sub> for NXU-1.

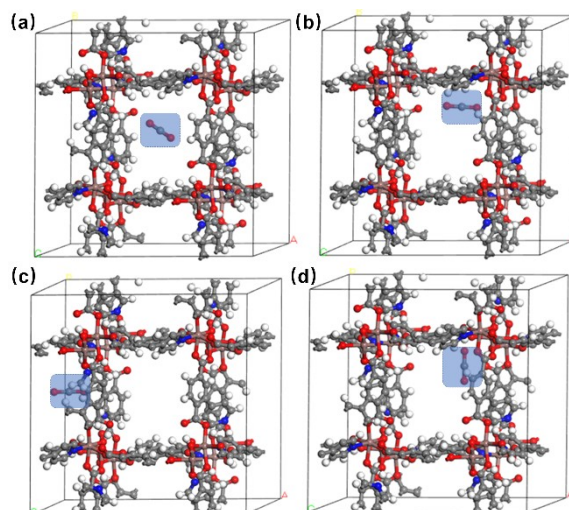

**Figure S13.** Optimized binding sites for CO<sub>2</sub> in NXU-1., C, gray; In, brown; O, red; N, blue.

### 3. References

1. Sheldrick, G. M. *SADABS: Program for Empirical Absorption Correction*; University of Göttingen: Göttingen, Germany, 1996.
2. Sheldrick, G. M. *SHELXS-2014 and SHELXL-2014: Program for Crystal Structure Determination*; University of Göttingen: Göttingen, Germany, 2014.
3. S. Xiang, H. Huang, and L. M. Hsiung. *Journal of nuclear materials*, 2008, **375**, 113-119.
